# Supplementary material for: Effect of Vibrotherapy on Body Fatness, Blood Parameters and Fibrinogen Concentration in Elderly Men
Source: MDPI journal article supplement (doi:10.3390/jcm10153259), 2021-07-23
Supplement: s1 [file s1]

**Table S1.** Values of blood morphological parameters in the whole group and in the control (CG) and the examined (VG) ones before applying vibrotherapy.

| Variables                | Total        | CG           | VG           | <i>p</i> |
|--------------------------|--------------|--------------|--------------|----------|
|                          | X ± SD       | X ± SD       | X ± SD       |          |
| Hb [g/dl]                | 15.0 ± 0.7   | 14.9 ± 0.7   | 15.3 ± 0.6   | 0.163    |
| Hct [%]                  | 44.0 ± 2.2   | 43.7 ± 2.6   | 44.4 ± 1.7   | 0.509    |
| RBC [T/L]                | 4.9 ± 0.4    | 4.8 ± 0.4    | 5.0 ± 0.3    | 0.223    |
| WBC [10 <sup>9</sup> /L] | 5.8 ± 1.0    | 5.6 ± 1.2    | 6.0 ± 0.7    | 0.159    |
| PLT [10 <sup>9</sup> /L] | 222.7 ± 56.2 | 220.1 ± 63.2 | 225.6 ± 50.5 | 0.829    |
| MPV [fl]                 | 12.1 ± 0.9   | 12.1 ± 0.7   | 12.0 ± 1.0   | 0.912    |
| PDW [%]                  | 15.8 ± 0.2   | 15.8 ± 0.2   | 15.8 ± 0.2   | 0.972    |
| PCT [%]                  | 0.3 ± 0.1    | 0.3 ± 0.1    | 0.3 ± 0.1    | 0.917    |
| MCV [fl]                 | 89.8 ± 3.0   | 91.2 ± 3.2   | 88.4 ± 2.2   | 0.030*   |
| MCH [pg]                 | 30.6 ± 1.1   | 30.9 ± 1.1   | 30.3 ± 1.0   | 0.232    |
| MCHC [g/dl]              | 34.1 ± 0.7   | 33.9 ± 0.8   | 34.3 ± 0.6   | 0.248    |
| RDW-CV [%]               | 13.7 ± 0.5   | 13.8 ± 0.5   | 13.6 ± 0.5   | 0.389    |
| RDW-SD [fl]              | 45.3 ± 2.3   | 46.4 ± 2.4   | 44.2 ± 1.7   | 0.026*   |

X – mean, SD – standard deviation, p – \* statistically significant value (p<0.05), Hb – hemoglobin, Hct – hematocrit, RBC – Red Blood Cells, WBC – White Blood Cells, PLT – Platelets, MPV- Mean Platelet Volume, PDW – Platelet Distribution Width, PCT– Plateletcrit, MCV - Mean Corpuscular Volume, MCH - Mean Corpuscular Hemoglobin, MCHC - Mean Corpuscular Hemoglobin Concentration, RDW-CV Red blood cell Distribution Width, RDW-SD – Red blood cell Distribution Width-Standard Deviation.

**Table S2.** Values of indexes of erythrocytes aggregation and fibrinogen concentration in the whole group and in the control (CG) and the examined (VG) ones before applying vibrotherapy.

| Variables | Total         | CG            | VG            | <i>p</i> |
|-----------|---------------|---------------|---------------|----------|
|           | <b>X ± SD</b> | <b>X ± SD</b> | <b>X ± SD</b> |          |
| AMP [au]  | 22.2 ± 3.0    | 21.0 ± 3.3    | 23.5 ± 2.0    | 0.051    |
| T ½ [s]   | 2.0 ± 0.6     | 2.1 ± 0.7     | 2.0 ± 0.5     | 0.747    |
| AI [%]    | 64.7 ± 6.8    | 65.7 ± 8.1    | 63.6 ± 5.2    | 0.504    |
| Fib [g/l] | 3.1 ± 0.6     | 3.1 ± 0.6     | 3.2 ± 0.7     | 0.522    |

X – mean, SD – standard deviation, AMP – Amplitude of aggregation, T½ – Half Time kinetics of aggregation, AI – Aggregation Index, Fib – fibrinogen.

**Table S3.** Values of the protein profile parameters in the whole group and in the control (CG) and the examined (VG) ones before applying vibrotherapy.

| Variables            | Total      | CG         | VG         | <i>p</i> |
|----------------------|------------|------------|------------|----------|
|                      | X ± SD     | X ± SD     | X ± SD     |          |
| Total proteins [g/l] | 74.1 ± 4.2 | 74.7 ± 4.5 | 73.5 ± 3.8 | 0.520    |
| Albumins [g/l]       | 58.5 ± 3.9 | 58.3 ± 4.5 | 58.7 ± 3.3 | 0.833    |
| α-1-globulins [g/l]  | 2.7 ± 2.3  | 3.1 ± 3.2  | 2.2 ± 0.3  | 0.888    |
| α-2-globulins [g/l]  | 10.5 ± 1.2 | 10.8 ± 1.4 | 10.3 ± 0.9 | 0.315    |
| β-1-globulins [g/l]  | 9.2 ± 1.0  | 9.0 ± 1.1  | 9.4 ± 0.8  | 0.360    |
| β-2-globulins [g/l]  | 7.2 ± 1.5  | 7.4 ± 1.4  | 6.9 ± 1.6  | 0.486    |
| γ-globulins [g/l]    | 12.4 ± 2.2 | 12.4 ± 2.3 | 12.4 ± 2.1 | 0.999    |

X – mean, SD – standard deviation.
